# Supplementary material for: MD simulation of the mesomorphic behaviour of 1-hexadecyl-3-methylimidazolium nitrate: assessment of the performance of a coarse-grained force field
Source: Royal Society of Chemistry journal article supplement (doi:10.1039/c2sm26376a), 2012-01-01
Supplement: c2sm26376a.pdf [file c2sm26376a.pdf]

# **MD simulation of the mesomorphic behaviour of 1-hexadecyl-3-methylimidazolium nitrate: assessment of the performance of a Coarse-Grained Force Field.**

**Giacomo Saielli\***<sup>a</sup>

Electronic Supporting Information

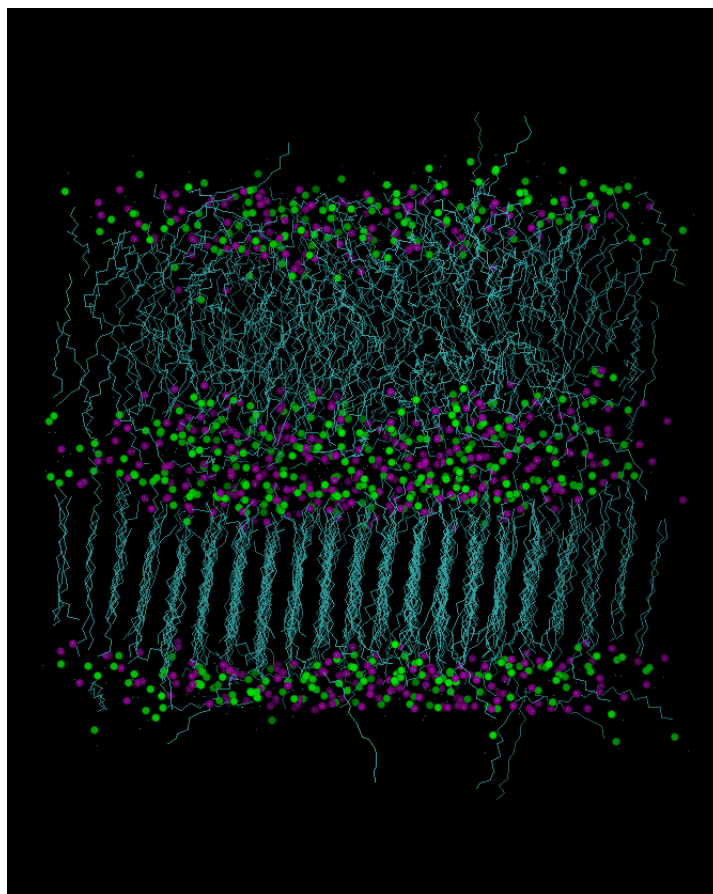

**Figure 1.** Snapshot of the box obtained at the end of the NPT simulation at 500 K showing the co-existence of a crystalline layer (bottom) and a smectic-like layer (top).

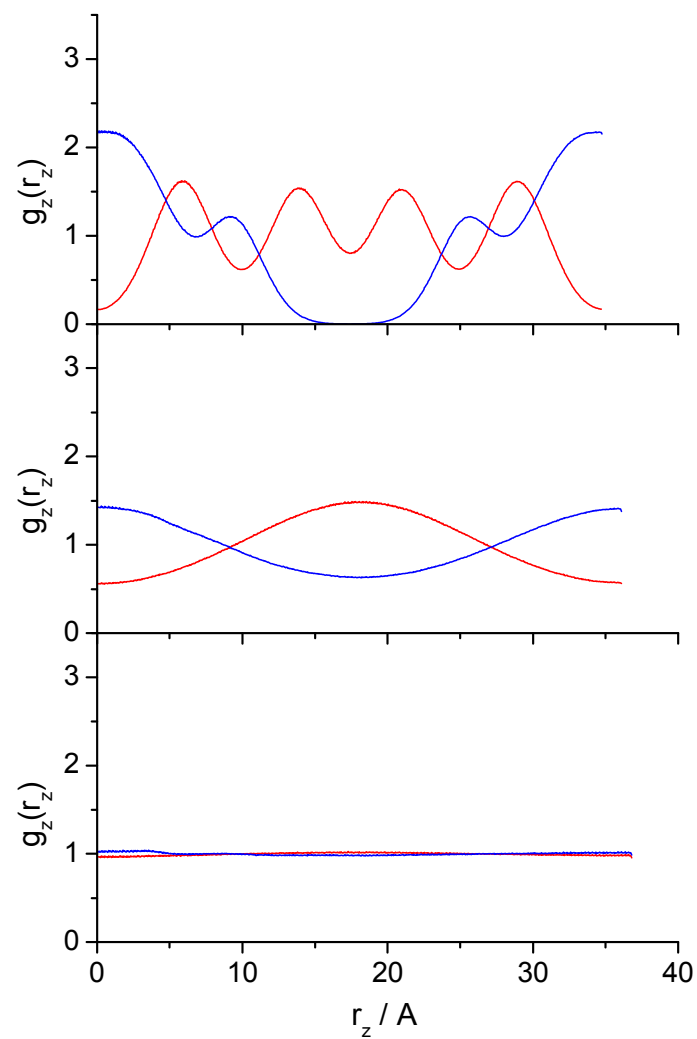

**Figure 2.** Cross pair distribution functions of the distance projected onto the z axis (the director orientation) at (from top to bottom) 450 K, 505 K and 600 K. Red AE sites; blue: AD sites.

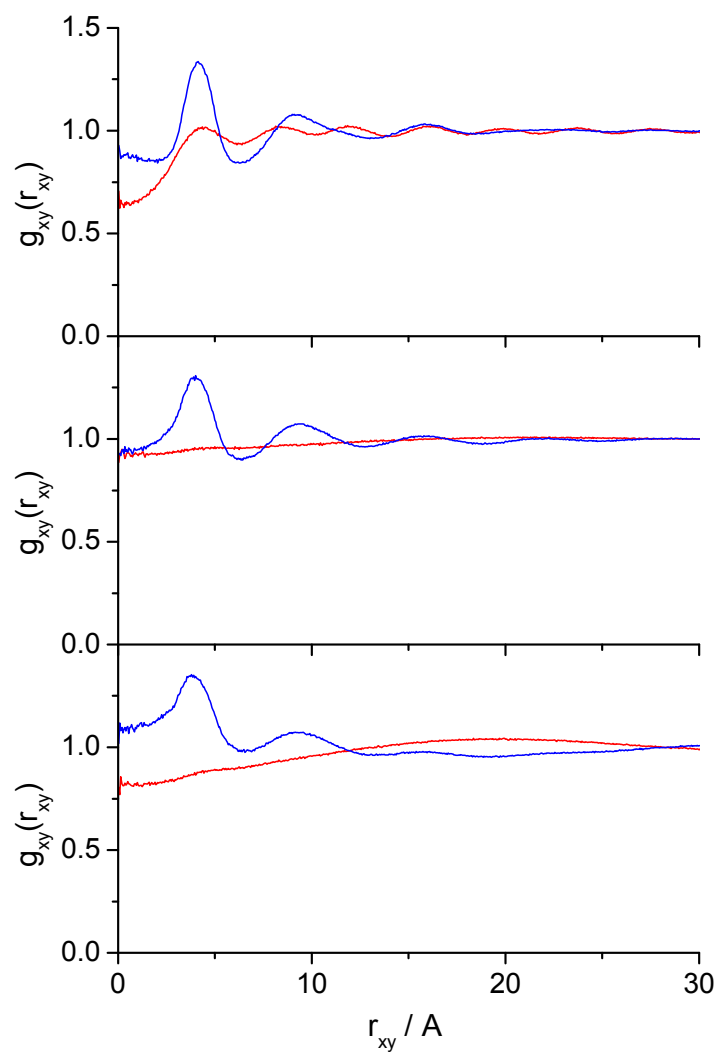

**Figure 3.** Cross pair distribution functions of the distance projected onto the  $xy$  plane (the normal to the director) at (from top to bottom) 450 K, 505 K and 600 K. Red AE sites; blue: AD sites.

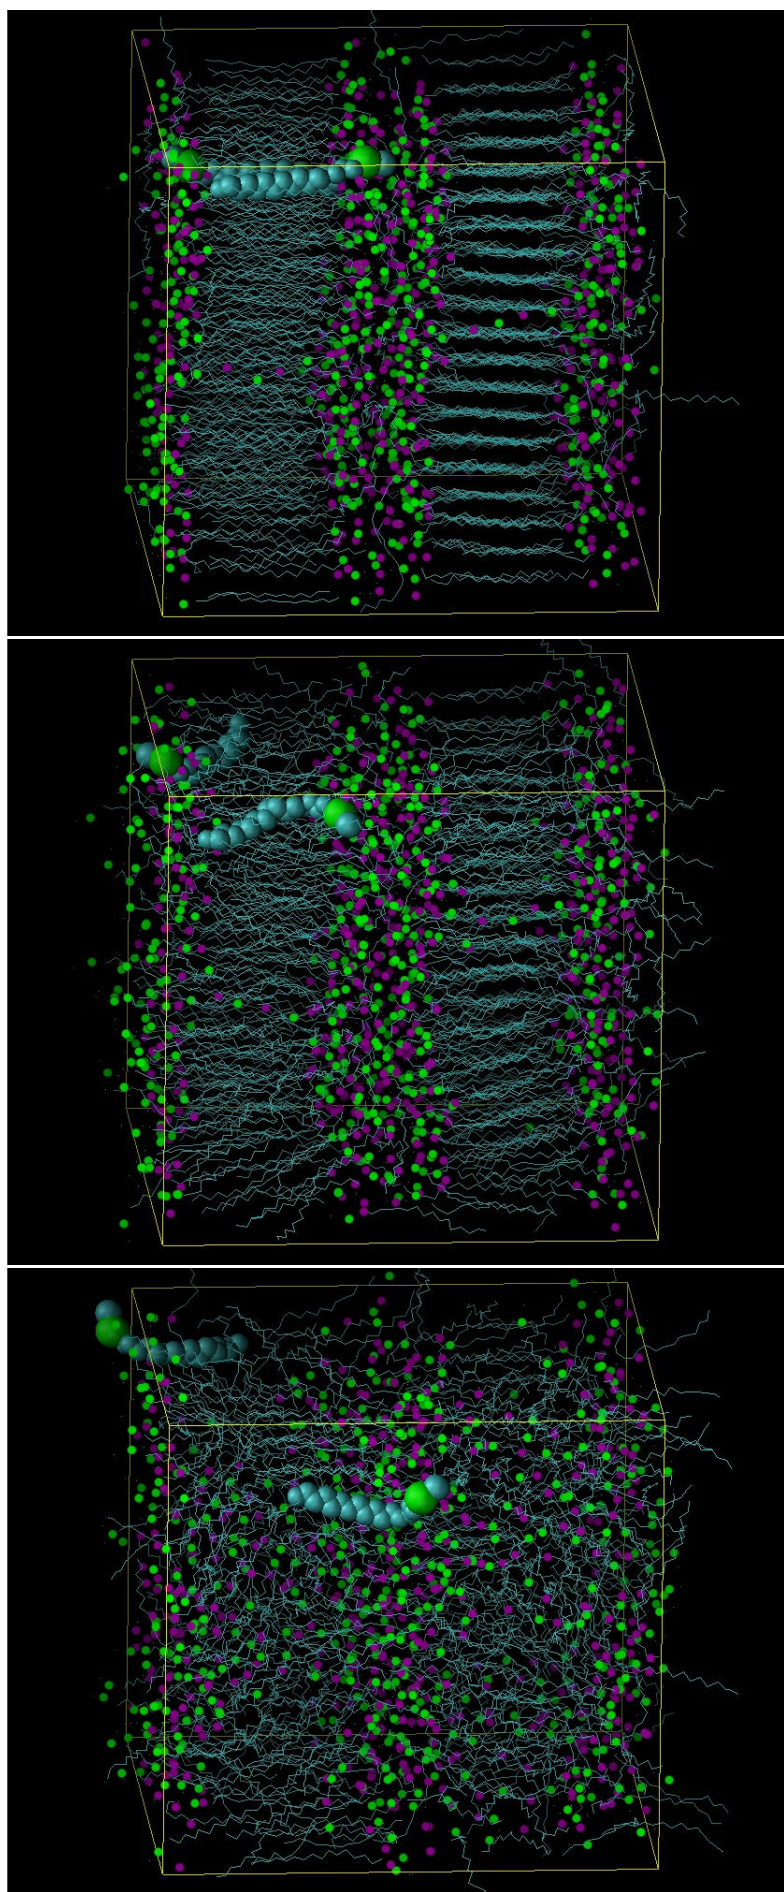

**Figure 4.** Snapshots taken after lowering the temperature at 470 K starting from the final configuration of the run equilibrated at 505 K. From left to right snapshots taken at 0 ns, 12 ns and 25 ns, respectively.



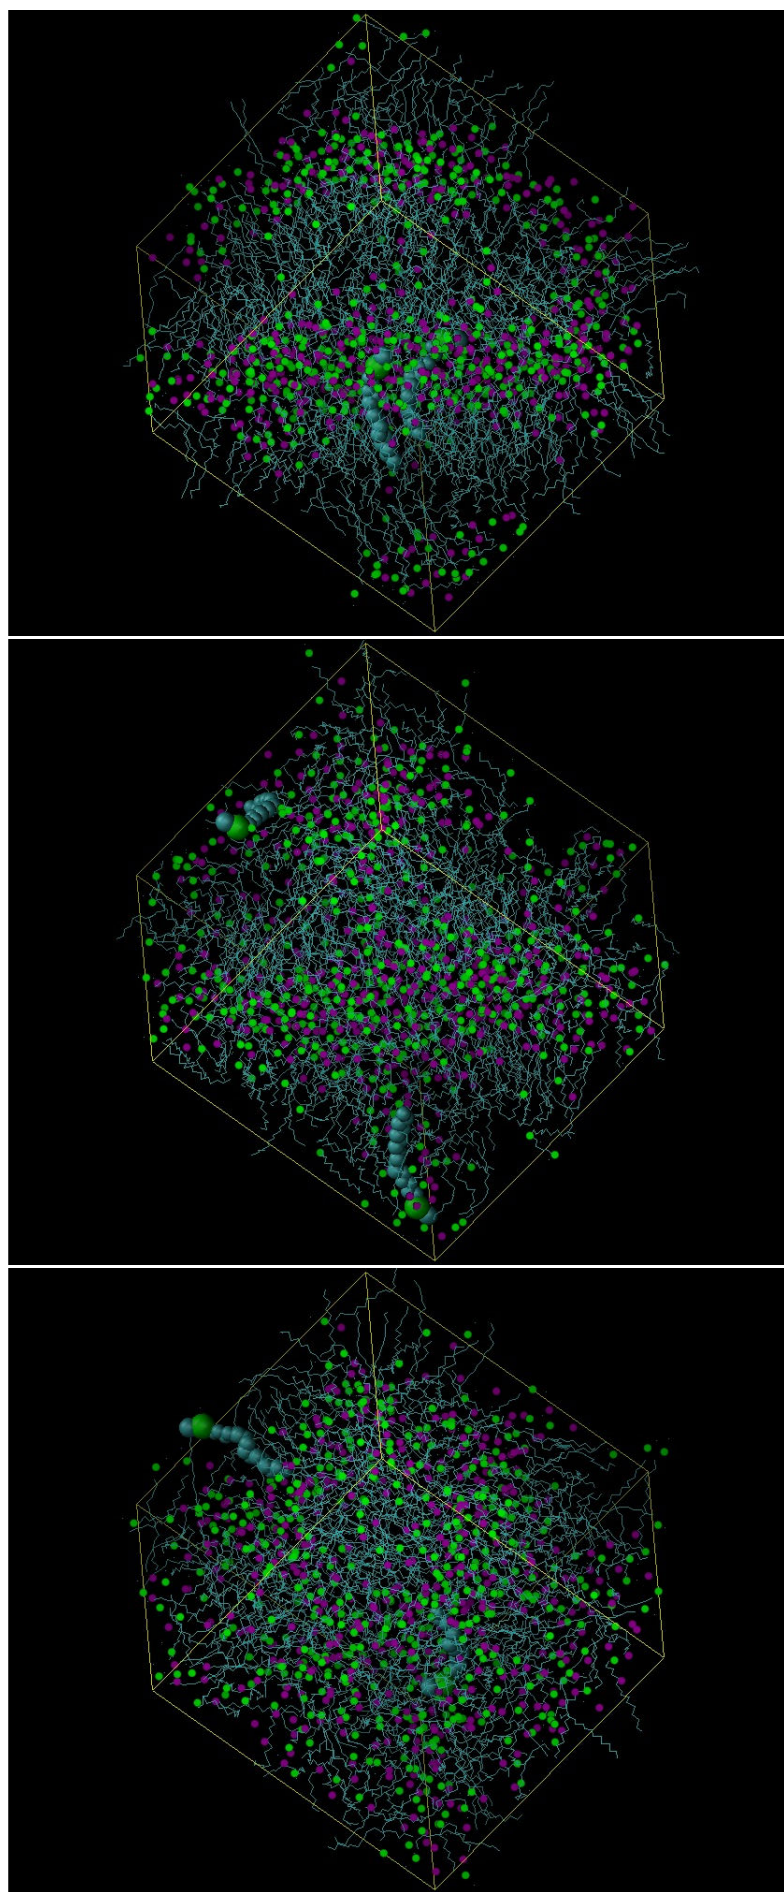

**Figure 5.** snapshots taken after lowering the temperature at 505 K starting from the final configuration of the run equilibrated at 600 K. From left to right snapshots taken at 0 ns, 25 ns and 50 ns, respectively. The system has been further equilibrated for more than 100 ns, remaining in the SmA phase.
